# Supplementary material for: Choice of ANaesthesia for EndoVAScular treatment of acute ischaemic stroke at posterior circulation (CANVAS II): protocol for an exploratory randomised controlled study
Source: PubMed Central journal article supplement — BMJ Open. 2020 Jul 31;10(7):e036358. doi: 10.1136/bmjopen-2019-036358 (PMC7398089; doi:10.1136/bmjopen-2019-036358), 2020-07-31
Supplement: bmjopen-2019-036358supp003.pdf [file bmjopen-2019-036358supp003.pdf]

## Supplementary file 3 Measurement glossary

| Physiological parameters |                                             |                                                                                                                                                                                         |
|--------------------------|---------------------------------------------|-----------------------------------------------------------------------------------------------------------------------------------------------------------------------------------------|
| Acronyms                 | Full Names                                  | Definition and Measurement description                                                                                                                                                  |
| SBP                      | systolic blood pressure                     | Recorded 10 min before treatment and every 10 min during procedure in case report form (CRF) table, every 5 min in electronic medical record system. Target value:>140 mmHg, <180 mmHg. |
| DBP                      | diastolic blood pressure                    | Recorded 10 min before treatment and every 10 min during procedure in CRF table, every 5 min in electronic medical record system. Target value:>105 mmHg                                |
| FiO <sub>2</sub>         | inspired oxygen fraction                    | Recorded 10 min before treatment and every 10 min during procedure in CRF table, every 5 min in electronic medical record system.                                                       |
| PaCO <sub>2</sub>        | arterial partial pressure of carbon dioxide | Tested through arterial line access. Tested every 1 hour during endovascular therapy (EVT).                                                                                             |
| ETCO <sub>2</sub>        | end-tidal carbon dioxide                    | Recorded 10 min before treatment and every 10 min during procedure in CRF table, every 5 min in electronic medical record system.                                                       |
| BIS                      | bispectral index                            | Recorded 10 min before treatment and every 10 min during procedure in CRF table, every 5 min in electronic medical record system.                                                       |
| ECG                      | electrocardiography                         | Recorded 5 min in electronic medical record system.                                                                                                                                     |
| HR                       | heart rate                                  | Recorded 10 min before treatment and every 10 min during procedure in CRF table, every 5 min in electronic medical record system.                                                       |

|                               |                                                        |                                                                                                                                                                                                                     |
|-------------------------------|--------------------------------------------------------|---------------------------------------------------------------------------------------------------------------------------------------------------------------------------------------------------------------------|
| S <sub>p</sub> O <sub>2</sub> | pulse oxygen saturation                                | Recorded 10 min before treatment and every 10 min during procedure in CRF table, every 5 min in electronic medical record system.                                                                                   |
| BP                            | blood pressure                                         | Non-invasive blood pressure on either arm, measured every 5 min during procedure. Recorded 10 min before treatment and every 10 min during procedure in CRF table, every 5 min in electronic medical record system. |
| Glu                           | serum glucose                                          | Tested before EVT treatment. During EVT, tested every 1 hour. Target value: 70-140 mg/L                                                                                                                             |
| MAP                           | mean artery pressure                                   | Recorded 10 min before treatment and every 10 min during procedure in CRF table, every 5 min in electronic medical record system.                                                                                   |
| ABG                           | arterial blood gas                                     | Monitored before treatment and every one hour during treatment, including Na <sup>+</sup> , K <sup>+</sup> , Cl <sup>-</sup> , PaCO <sub>2</sub> , PaO <sub>2</sub> , PH, glucose.                                  |
| <b>Evaluation</b>             |                                                        |                                                                                                                                                                                                                     |
| <b>Acronyms</b>               | <b>Full Names</b>                                      | <b>Definition and Measurement description</b>                                                                                                                                                                       |
| mRS                           | modified Rankin scale                                  | Measured 30 days and 90 days after treatment                                                                                                                                                                        |
| NIHSS                         | National Institute of Health stroke scale              | Measured before treatment, 24hrs, 7 days, 30 days and 90 days after treatment                                                                                                                                       |
| mTICI                         | modified Thrombolysis in Cerebral Infarction           | Measured before EVT and immediately after recanalization.                                                                                                                                                           |
| GCS                           | Glasgow coma score                                     | Measured before treatment, 24h and 90 days after treatment                                                                                                                                                          |
| pc-ASPECTS                    | post-circulation Alberta Stroke Program Early CT Score | Measured before treatment                                                                                                                                                                                           |
| <b>Work flow</b>              |                                                        |                                                                                                                                                                                                                     |

| <b>Name</b>                      | <b>Definition and description</b>                                                          |
|----------------------------------|--------------------------------------------------------------------------------------------|
| Onset to door                    | The duration between patient last know to be well and arriving to radiological suite.      |
| Door to groin puncture           | The duration between patient arriving at radiological suite and groin puncture initiating. |
| Puncture complete                | The duration between groin puncture initiating and puncture completing.                    |
| Groin puncture to recanalization | The time duration between puncture complete and recanalization.                            |
| Recanalization time              | The time duration between onset to recanalization success.                                 |
| Recover time                     | The time duration between pressing against the puncture site and transferring to NICU.     |
